# Supplementary material for: Impact of the proximity effect on uranyl coordination of conformationally variable weakly-bonded cucurbit[6]uril-bipyridinium pseudorotaxane
Source: Royal Society of Chemistry journal article supplement (doi:10.1039/d1ce01330k), 2022-01-01
Supplement: d1ce01330k1.pdf [file d1ce01330k1.pdf]

1           **Impact of Proximity Effect on Uranyl Coordination of Conformationally Variable**  
2                           **Weakly-Bonded Cucurbit[6]uril-Bipyridinium Pseudorotaxane**

3  
4           *Feize Li,<sup>a, b</sup> Lei Mei,<sup>\*b</sup> Haiyue Peng,<sup>a</sup> Kongqiu Hu,<sup>b</sup> Zhifang Chai,<sup>b, c</sup> and Ning Liu<sup>\*a</sup>*

5  
6           <sup>a</sup> Key Laboratory of Radiation Physics and Technology of the Ministry of Education, Institute of  
7           Nuclear Science and Technology, Sichuan University, Chengdu 610064, P. R. China.

8           <sup>b</sup> Laboratory of Nuclear Energy Chemistry, Institute of High Energy Physics, Chinese Academy of  
9           Sciences, Beijing 100049, P. R. China.

10          <sup>c</sup> Engineering Laboratory of Advanced Energy Materials, Ningbo Institute of Industrial Technology,  
11          Chinese Academy of Sciences, Ningbo, Zhejiang, 315201, P. R. China.

12  
13          **Corresponding Author**

14          \*E-mail: [meil@ihep.ac.cn](mailto:meil@ihep.ac.cn) (Mei Lei); [nliu720@scu.edu.cn](mailto:nliu720@scu.edu.cn) (Ning Liu)

15  
16

17 **Abstract.** To explore the proximity effect in uranyl coordination of weak-bonded  
18 cucurbit[6]uril(CB[6])-bipyridinium ligands, a new pseudorotaxane precursor **C7BPCN3@CB[6]**  
19 containing 1, 1'-(heptyl-1,7-diyl)bis(3-cyanopyridin-1-ium) bromide (**C7BPCN3**) with elongated  
20 alkyl chains and *meta*-substituted cyano groups, has been synthesized and used to react with the  
21 uranyl cations. Due to the weak binding affinity between the host and guest components of the  
22 supramolecular ligand, five new uranyl-rotaxane coordination polymers **URCP1-URCP5** have  
23 been prepared, in which the pseudorotaxane linkers have shown great conformation diversity and  
24 abundant coordination behaviors. Three different coordination modes are present in these as-  
25 synthesized uranyl compounds, one of which is host-guest synergetic coordination due to the  
26 proximity effect between the *meta*-coordination carboxylate groups of **C7BPCN3** and the portal  
27 carbonyls of CB[6]. Specially, the elongated spacer and weak-bonded feature make only one end of  
28 **C7BPCN3@CB[6]** ligand involved in host-guest synergetic chelating with the uranyl centre,  
29 leaving the other one participated in metal-organic coordination only by the guest. It is the first time  
30 that this unique coordination mode has been observed in uranyl coordination polyrotaxanes. This  
31 work demonstrates the proximity effect on uranyl coordination of weak-bonded CB[6]-bipyridinium  
32 pseudorotaxane linkers, and provide an alternative approach to achieve metal coordination  
33 regulation and structure diversity in uranyl coordination polymers involving mechanically  
34 interlocked molecules.

35

## 36 Introduction

37 Recently, uranium-organic materials (UOMs) featured with uranyl cations/clusters acting as metal  
38 nodes have drawn more and more attention<sup>1-2</sup>. After exquisite designs, abundant UOMs varying  
39 from zero-dimensional (0D) to three-dimensional (3D) have been synthesized<sup>3-4</sup>, which have  
40 dramatically facilitated the recognition of actinide chemistry, especially those involving solid-state  
41 coordination polymers. On the other hand, benefitting from the special characteristics of the actinide  
42 elements, new uranyl-based functional materials with potential application in high-performance  
43 separation<sup>5-9</sup>, selective detection<sup>10-11</sup>, chemical sensing,<sup>12-13</sup> and heterogeneous catalysis<sup>14-16</sup> have  
44 been also reported. Although the development of functional UOMs has made great progresses in the  
45 past decade, it's still at the early stage when compared with the well-studied metal-organic materials  
46 based on transition metal elements. Hence, the design and synthesis of new UOMs is still of great  
47 significance in solid-state chemistry of actinides.

48

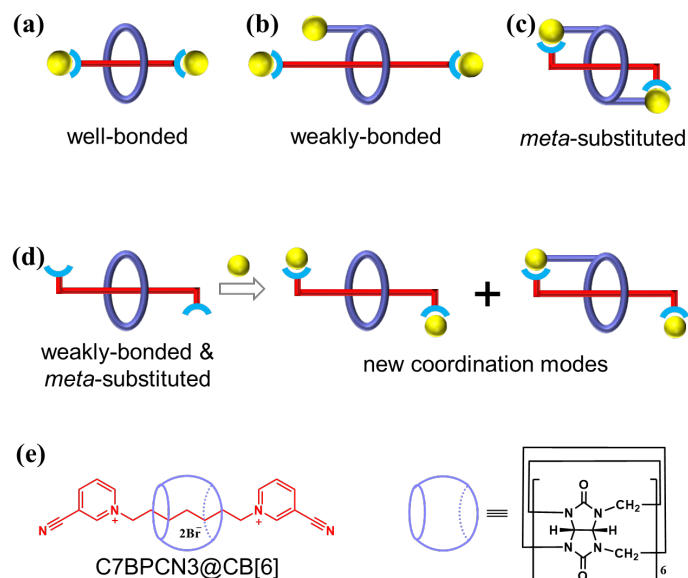

50 **Scheme 1.** (a) The most common connecting pattern of well-bonded pseudorotaxane ligand: only the string guest  
51 with end functional groups coordinates with the uranyl centre. (b) Weakly-bonded pseudorotaxane ligand can  
52 produce a new connecting pattern: both the CB[6] host and the string guest can simultaneously coordinate with  
53 different uranyl centre. (c) For the pseudorotaxane ligand with meta-substituted carboxylate groups: both the host  
54 and guest components can synergistically coordinate with the same uranyl centre. (d) New coordination modes may  
55 be expected in the weakly-bonded pseudorotaxane with meta-substituted functional groups. (e) The presentation of  
56 the weakly-bonded C7BPCN3@CB[6] ligand with the functional groups located at meta-position.

57

58 Due to the restrained first coordination sphere of uranyl caused by the intrinsic axial oxygen  
59 atoms, introducing new ligands might be a highly feasible way to obtain novel UOMs with novel

60 structures and special features. Among all the available organic linkers, pseudorotaxanes have been  
61 demonstrated to be a kind of versatile precursors which can endow the prepared materials with  
62 unique topologies<sup>17-18</sup> and molecular dynamics<sup>19-21</sup>. In a typical pseudorotaxane, the macrocyclic  
63 host and the string guest bond with each other through weak interactions between these two  
64 components. This provides an important platform for designing new organic ligands through non-  
65 covalent binding, which can produce richer variations in the linkers than direct chemical  
66 modification. In addition, pseudorotaxanes can exhibit plenty of coordination behaviors during the  
67 assembly with metal cations, since the intermolecular interactions may lead to much more flexibility  
68 in the supramolecular linkers.

69 However, for most pseudorotaxanes, especially these based on CB[6], an inevitable issue is  
70 that the macrocyclic hosts in well-bonded precursors were not easy to participate in the coordination  
71 with the metal centres<sup>22-27</sup>. Usually, only the di-cationic guest flanked with two chelate ligands can  
72 coordinate with the uranyl centre, with the macrocyclic host hanging on the skeleton (Scheme 1a).  
73 To address such problem, we proposed two approaches in the previous work concerning CB[6]-  
74 based uranyl-rotaxane coordination polymers (URCPs). The first one is applying weakly-bonded  
75 host-guest complexes as precursors to react with uranyl cations.<sup>28-30</sup> For instance, when the alkyl  
76 chain was prolonged from hexyl (C6) to heptyl (C7), the guests size would not well match the cavity  
77 of the CB[6] host, which could effectively reduce the steric hindrance around the portal carbonyl  
78 groups. Therefore, the CB[6] hosts could simultaneously approach the metal cations like the string  
79 molecules, but coordinate with different uranyl centres (Scheme 1b).

80 Another regulation strategy was moving the end carboxylate groups from *para*- to *meta*-  
81 position<sup>31</sup>. This strategy has also been demonstrated to be effective, even for the well-bonded CB[6]-  
82 based pseudorotaxane ligand (*i.e.* those with the guest length being as C6), since the special  
83 molecular configuration could produce proximity effect around the portals, resulting in a host-guest  
84 synergetic coordination mode (both the macrocyclic host and the string guest coordinate with the  
85 same uranyl centre) in related uranyl polyrotaxanes (Scheme 1c). Based on the foregoing research,  
86 an interesting question is what effect will the combination of the above two strategies have on the  
87 assembly of uranyl rotaxane coordination compounds. Obviously, this may result in a more  
88 complicated effect on the coordination mode of pseudorotaxane, such as a mixture of multiple  
89 behaviors in one compound including unilaterally-synergetic coordination mode (Scheme 1d).

90 In this work, with an attempt to investigate the possible new coordination modes of weakly-  
 91 bonded pseudorotaxane with meta-substituted functional groups in URCPs, we pre-assembled 1,1'-  
 92 (heptyl-1,7-diyl)bis(3-cyanopyridin-1-ium) bromide (**C7BPCN3**) and CB[6] to give a weakly-  
 93 bonded pseudorotaxane precursor (**C7BPCN3@CB[6]**) with the end functional groups located at  
 94 the *meta*-position (Scheme 1e). Then this new pseudorotaxane was used to react with uranyl cations,  
 95 leading to five uranyl coordination polyrotaxanes **URCP1-URCP5** with 1D or 2D structures. The  
 96 connecting patterns of the pseudorotaxane ligands have been demonstrated to show abundant variety,  
 97 and the structure-dependent regulation mechanism of these URCPs is discussed in detail. The  
 98 physico-chemical properties of these prepared URCPs have also been characterized by  
 99 thermogravimetric analysis, infrared spectroscopy, and photoluminescent spectroscopy.

100

## 101 **Methods and Experiments.**

102

103 **Table S1.** The synthetic information for **URCP1-URCP5**.

|                                                            | <b>URCP1</b> | <b>URCP2</b> | <b>URCP3</b> | <b>URCP4</b> | <b>URCP5</b> |
|------------------------------------------------------------|--------------|--------------|--------------|--------------|--------------|
| <b>C7BPCN3@CB[6]</b> (mg)                                  | 30.0         | 30.0         | 30.0         | 30.0         | 30.0         |
| 0.5 M UO <sub>2</sub> (NO <sub>3</sub> ) <sub>2</sub> (μL) | 70           | 70           | 70           | 70           | 70           |
| Na <sub>2</sub> C <sub>2</sub> O <sub>4</sub> (mg)         | 0            | 4.5          | 0            | 0            | 0            |
| Na <sub>2</sub> SO <sub>4</sub> (mg)                       | 0            | 0            | 5.0          | 5.0          | 5.0          |
| H <sub>2</sub> O (mL)                                      | 2            | 2            | 2            | 2            | 2            |
| 4 M HNO <sub>3</sub> (μL)                                  | 0            | 10           | 10           | 0            | 0            |
| 1 M NaOH (μL)                                              | 0            | 0            | 0            | 0            | 20           |
| temp (°C)                                                  | 150          | 150          | 150          | 150          | 150          |
| time (h)                                                   | 72           | 72           | 72           | 72           | 72           |
| yield (%) based on uranium                                 | 40.5         | —            | —            | 78.2         | 62.4         |

104

105 For the syntheses of **URCP1** ((UO<sub>2</sub>)<sub>2</sub>(μ<sub>2</sub>-OH)<sub>2</sub>Br(NO<sub>3</sub>)(**C7BPCA3@CB[6]**)<sub>2</sub>·2H<sub>2</sub>O), **URCP2**  
 106 ((UO<sub>2</sub>)<sub>2</sub>(C<sub>2</sub>O<sub>4</sub>)(NO<sub>3</sub>)<sub>2</sub>(**C7BPCA3@CB[6]**)·4H<sub>2</sub>O), **URCP3**  
 107 ((UO<sub>2</sub>)<sub>2</sub>(SO<sub>4</sub>)<sub>2</sub>(H<sub>2</sub>O)<sub>4</sub>(**C7BPCA3@CB[6]**)·8H<sub>2</sub>O), **URCP4**  
 108 (((UO<sub>2</sub>)(H<sub>2</sub>O)<sub>3</sub>(**C7BPCA3@CB[6]**)<sub>4</sub>·((UO<sub>2</sub>)<sub>2</sub>(SO<sub>4</sub>)<sub>2</sub>(μ<sub>2</sub>-OH)<sub>2</sub>(**C7BPCA3@CB[6]**)<sub>4</sub>HCl)) and  
 109 **URCP5** ((UO<sub>2</sub>)<sub>3</sub>(SO<sub>4</sub>)<sub>2</sub>(H<sub>2</sub>O)(μ<sub>2</sub>-OH)<sub>2</sub>(**C7BPCA3@CB[6]**)<sub>2</sub>·6H<sub>2</sub>O), 30.0 mg of pseudorotaxane

110 precursor **C7BPCN3@CB[6]** and 70  $\mu\text{L}$  of uranyl nitrate (0.5 M) were added into a Teflon lined  
111 stainless-steel vessel. After adding 2 mL of deionized water, the reactors were transferred into an  
112 oven and heated at 150  $^{\circ}\text{C}$  for 72 h. After naturally cooling to room temperature, yellow single  
113 crystals were collected from the solution for single crystal X-ray diffraction. The remained were  
114 alternatively rinsed with water and ethanol for 3~5 times, and dried at 50  $^{\circ}\text{C}$  overnight for further  
115 characterizations. Additionally, two small co-existing anions (oxalate and sulfate) with different  
116 coordination capacity were also introduced into the reaction system, in order to regulate the  
117 coordination behaviors of the pseudorotaxane ligands and the final structure of obtained compounds.  
118 The synthetic conditions are listed in Table 1.

119 The single crystal X-ray diffractions for all obtained compounds were performed on Bruker D8  
120 VENTURE X-ray CMOS diffractometer with a Mo  $K\alpha$  ( $\lambda = 0.71073 \text{ \AA}$ ) or a Cu  $K\alpha$  ( $\lambda = 1.54184$   
121  $\text{\AA}$ ) X-ray source at room temperature or 170 K according to the crystal qualities.. The powder X-  
122 ray diffraction (PXRD) spectra were performed on a Bruker D8 Advance diffractometer with Cu  $K\alpha$   
123 radiation ( $\lambda = 1.5406 \text{ \AA}$ ). The thermogravimetric analyses (TGA) were determined on a TA Q500  
124 analyzer. A Bruker Invenio-R spectrometer was employed to obtain the Fourier transform infrared  
125 (FTIR) spectra. Solid-state photoluminescence (PL) spectra were obtained using a Hitachi F-4600  
126 fluorescence spectrophotometer.  $^1\text{H-NMR}$  spectra were recorded on a Bruker AVANCE III (500  
127 MHz, Bruker, Switzerland) with deuterium oxide as a solvent. ESI-MS spectra were obtained with  
128 a Bruker AmaZon SLion-trap mass spectrometer (Bruker, USA).

129 For **C7BPCA3@CB[6]** and **URCP1-URCP5**, the single crystal X-ray diffractions data were  
130 integrated with the SAINT software package, and multi-scan absorption correction was completed  
131 using SADABS. The crystal structures for all compounds were solved by means of direct methods  
132 (SHELXL-97<sup>32</sup>) and refined with full-matrix least squares techniques on  $F^2$  using SHELXL-2018<sup>32-</sup>  
133 <sup>33</sup> and *Olex2*<sup>34</sup> software packages. Hydrogen atoms of the carbon atoms and water molecules were  
134 added at theoretically calculated positions, treated as riding ones with isotropic displacement  
135 parameters 1.2 times higher than that of the parent atoms. Due to the disordered structures, some  
136 hydrogen atoms originally belonging to part of the water solvent molecules in **URCP2**, **URCP3** and  
137 **URCP5** could not be added. For **URCP5**, PLATON/SQUEEZE<sup>35</sup> was applied to calculate the  
138 diffraction contribution of the solvent molecules and further refinements were performed based on  
139 the obtained new sets of diffraction intensity. The coordinated bromide anion was split into three  
140 parts, because of the disordered structure. Other restraints such as ISOR and DFIX have also been

141 adopted in the uranyl coordination polymers, to achieve better refinements. Crystal data of all  
 142 compounds are listed in Table 2, and the selected bond lengths are listed in Table S1.  
 143 Crystallographic data in this work have been deposited with Cambridge Crystallographic Data  
 144 Centre, and the CCDC numbers are: 2105868 (**C7BPCA3@CB[6]**), 2105869 (**URCP1**), 2105870  
 145 (**URCP2**), 2105871 (**URCP3**), 2105872 (**URCP4**) and 2105873 (**URCP5**).

146  
 147 **Table 2.** Crystallographic data and structure refinement results for **C7BPCA3@CB[6]** and **URCP1-URCP5**.

|                                           | <b>C7BPCA3@CB[6]</b>                                                                          | <b>URCP1</b>                                                                                      | <b>URCP2</b>                                                                                    |
|-------------------------------------------|-----------------------------------------------------------------------------------------------|---------------------------------------------------------------------------------------------------|-------------------------------------------------------------------------------------------------|
| <b>formula</b>                            | C <sub>55</sub> H <sub>90</sub> N <sub>26</sub> O <sub>32</sub>                               | C <sub>110</sub> H <sub>120</sub> BrN <sub>54</sub> O <sub>60</sub> U <sub>4</sub>                | C <sub>57</sub> H <sub>59</sub> N <sub>28</sub> O <sub>34</sub> U <sub>2</sub>                  |
| <b>fw</b>                                 | 1627.52                                                                                       | 4190.62                                                                                           | 2159.40                                                                                         |
| <b>crystal sys</b>                        | monoclinic                                                                                    | monoclinic                                                                                        | triclinic                                                                                       |
| <b>space group</b>                        | C2/c                                                                                          | Cc                                                                                                | <i>P</i> $\bar{1}$                                                                              |
| <b>a, Å</b>                               | 15.0060(13)                                                                                   | 18.3214(7)                                                                                        | 12.304(2)                                                                                       |
| <b>b, Å</b>                               | 20.6811(16)                                                                                   | 17.8962(7)                                                                                        | 12.4966(18)                                                                                     |
| <b>c, Å</b>                               | 22.944(2)                                                                                     | 22.4009(9)                                                                                        | 13.125(2)                                                                                       |
| <b><math>\alpha</math>, degree</b>        | 90                                                                                            | 90                                                                                                | 64.880(6)                                                                                       |
| <b><math>\beta</math>, degree</b>         | 99.494(4)                                                                                     | 113.982(3)                                                                                        | 89.809(6)                                                                                       |
| <b><math>\gamma</math>, degree</b>        | 90                                                                                            | 90                                                                                                | 79.159(6)                                                                                       |
| <b>V, Å<sup>3</sup></b>                   | 7022.8(10)                                                                                    | 6710.8(5)                                                                                         | 1787.8(5)                                                                                       |
| <b>T, K</b>                               | 293                                                                                           | 292                                                                                               | 292                                                                                             |
| <b>F (000)</b>                            | 3432.0                                                                                        | 4052.2                                                                                            | 1042.0                                                                                          |
| <b>Dc (g cm<sup>-3</sup>)</b>             | 1.539                                                                                         | 2.064                                                                                             | 1.987                                                                                           |
| <b><math>\mu</math> (mm<sup>-1</sup>)</b> | 0.127                                                                                         | 5.097                                                                                             | 4.639                                                                                           |
| <b>R<sub>int</sub></b>                    | 0.0512                                                                                        | 0.0524                                                                                            | 0.0782                                                                                          |
| <b>R1, wR2</b>                            | 0.0556, 0.1561                                                                                | 0.0270, 0.0626                                                                                    | 0.0423, 0.1035                                                                                  |
|                                           | <b>URCP3</b>                                                                                  | <b>URCP4</b>                                                                                      | <b>URCP5</b>                                                                                    |
| <b>formula</b>                            | C <sub>55</sub> H <sub>82</sub> N <sub>26</sub> O <sub>40</sub> S <sub>2</sub> U <sub>2</sub> | C <sub>110</sub> H <sub>122</sub> ClN <sub>52</sub> O <sub>51</sub> S <sub>2</sub> U <sub>3</sub> | C <sub>110</sub> H <sub>128</sub> N <sub>52</sub> O <sub>56</sub> S <sub>2</sub> U <sub>3</sub> |
| <b>fw</b>                                 | 2287.61                                                                                       | 3802.25                                                                                           | 3852.85                                                                                         |
| <b>crystal sys</b>                        | triclinic                                                                                     | orthorhombic                                                                                      | monoclinic                                                                                      |
| <b>space group</b>                        | <i>P</i> $\bar{1}$                                                                            | <i>P</i> 2 <sub>1</sub> 2 <sub>1</sub>                                                            | <i>P</i> 2 <sub>1</sub> /c                                                                      |
| <b>a, Å</b>                               | 12.4914(7)                                                                                    | 23.1168(13)                                                                                       | 23.0996(13)                                                                                     |
| <b>b, Å</b>                               | 13.5836(7)                                                                                    | 24.6194(15)                                                                                       | 18.4319(11)                                                                                     |
| <b>c, Å</b>                               | 13.6906(6)                                                                                    | 24.9596(10)                                                                                       | 33.9541(19)                                                                                     |
| <b><math>\alpha</math>, degree</b>        | 105.650(2)                                                                                    | 90                                                                                                | 90                                                                                              |
| <b><math>\beta</math>, degree</b>         | 95.320(2)                                                                                     | 90                                                                                                | 103.095(2)                                                                                      |
| <b><math>\gamma</math>, degree</b>        | 113.732(2)                                                                                    | 90                                                                                                | 90                                                                                              |
| <b>V, Å<sup>3</sup></b>                   | 1993.62(18)                                                                                   | 14205.1(13)                                                                                       | 14080.7(14)                                                                                     |
| <b>T, K</b>                               | 292                                                                                           | 302                                                                                               | 143                                                                                             |
| <b>F (000)</b>                            | 1111.0                                                                                        | 7516.0                                                                                            | 7632.0                                                                                          |
| <b>Dc (g cm<sup>-3</sup>)</b>             | 1.885                                                                                         | 1.778                                                                                             | 1.817                                                                                           |
| <b><math>\mu</math> (mm<sup>-1</sup>)</b> | 4.220                                                                                         | 3.567                                                                                             | 10.850                                                                                          |
| <b>R<sub>int</sub></b>                    | 0.051                                                                                         | 0.1397                                                                                            | 0.0631                                                                                          |

| <i>R1, wR2</i> | 0.0506, 0.1496 | 0.0881, 0.2746 | 0.0439, 0.1159 |
|----------------|----------------|----------------|----------------|
|----------------|----------------|----------------|----------------|

148

149 **Structure Description.** **URCP1** crystallizes in the space group of *Cc* and is a chain-like compound.  
 150 The uranyl centre is dimeric and both uranium atoms are 7-fold coordinated (Figure 1a and S5). For  
 151 U1, besides the two axial oxygen atoms, there are two oxygen atoms from a bidentate carboxylate  
 152 group of **C7BPCA3**, two  $\mu_2$ -hydroxyl oxygen atoms and a bromide anion coordinating with the  
 153 metal centre from the equatorially plane. U2 centre, the other uranium unit of dimeric uranyl node,  
 154 has a slightly different coordination sphere. Except two axial oxygen atoms and two shared  $\mu_2$ -oxo  
 155 oxygen atoms, two oxygen atoms from a bidentate-coordinated nitrate anion and one oxygen atom  
 156 from the carboxylate group of **C7BPCA3** coordinate with U2. The U=O distances vary from 1.768(9)  
 157 to 1.777(1) Å, with the angles of O=U=O being 179.4(4) $^\circ$  (U1) and 175.8(5) $^\circ$  (U2). The U-O bond  
 158 lengths range from 2.273(11) to 2.529(10) Å. Specifically, the U-Br is found to be 2.805(5) Å, which  
 159 is quite consist with the previous work.<sup>31</sup> **C7BPCA3** linkers connect the dimeric uranyl nodes to  
 160 form a zigzag chain (Figure 3b), with the CB[6] hosts hanging on the chain like beads.

161

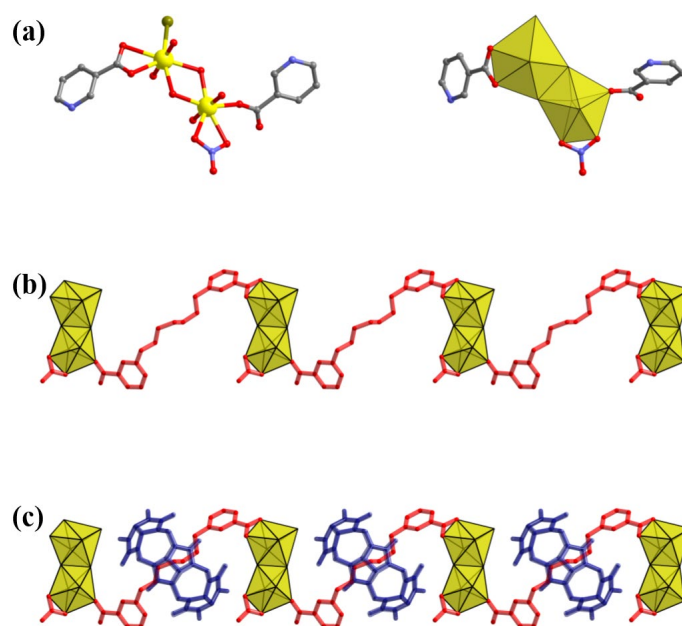

163

164 **Figure 1.** (a) Coordination environment for the dimeric uranyl centre in **URCP1**: the left is the one with the uranyl  
 165 centre is shown as stick-ball mode and the right is shown as polyhedron mode. (b) The 1D uranyl-directed chain  
 166 linked by **C7BPCA3** guests (c) The CB[6] hosts hang on the alkyl chains of **C7BPCA3** guests.

167

168 **URCP2** is a chain-like polyrotaxane that crystallizes in the space group of  $P\bar{1}$ . As shown in Figure  
 169 2a and S6, a dimeric metal node bridged by an oxalate anion can be observed in this compound, of



170 which two uranium centres are both 8-fold coordinated and crystallographically equivalent with  
171 each other. In addition to the two intrinsic axial oxygen atoms of uranyl cation, there are other six  
172 ones in the equatorial plane. Specifically, a bidentate-coordinated carboxylate group from  
173 **C7BPCA3**, a bidentate-coordinated nitrate anion together with a bilaterally-chelated oxalate anion  
174 has bound to the uranyl cation, respectively. The U=O bond lengths are 1.736(8) and 1.737(8) Å,  
175 while the O=U=O angle is measured to be 179.0(4)°. The U-O bond lengths is found to be in the  
176 range of 2.434(7) ~ 2.561(8) Å. The uranyl dimers are connected by **C7BPCA** linkers, forming an  
177 1D chain with nitrate anions located at the terminals (Figure 2b). CB[6] hosts, like the macrocyclic  
178 molecules presented in most cases involving cucurbituril-based uranium coordination polymers, just  
179 hang on the skeleton of the chain-like compounds, without coordination with the metal centres  
180 (Figure 2c).

181

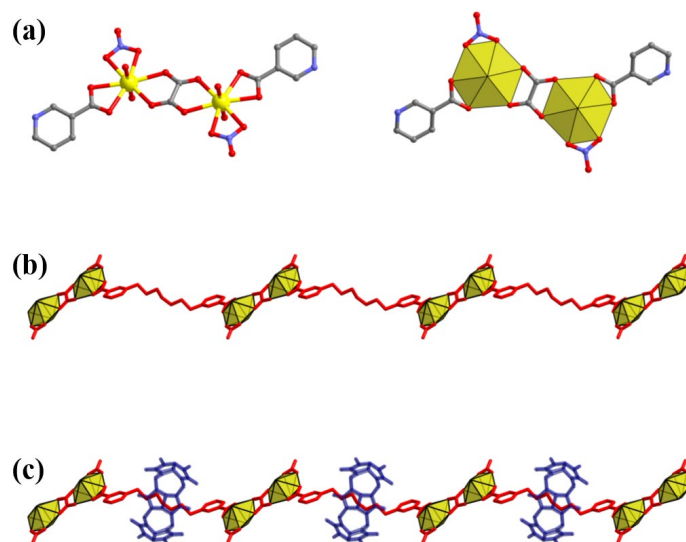

183

184 **Figure 2.** (a) Coordination environment for the dimeric uranyl centre in **URCP2**: the left is one with the uranyl  
185 centre is shown as stick-ball mode and the right is shown as polyhedron mode. (b) The 1D uranyl-directed chain  
186 linked by **C7BPCA3** guests, with oxalate and nitrate anions locate at the terminal of the metal cations. (c) The CB[6]  
187 hosts hang on the alkyl chains of **C7BPCA3** guests.

188

189 **URCP3** is also a 1D chain-like compound and crystallizes in the space group of  $P\bar{1}$ . As shown in  
190 Figure 3a and S7a, two sulfate anions bridge two uranyl cations to give a dimeric metal centre. The  
191 two uranium atoms are crystallographically equivalent and 7-fold coordinated. There are two axial  
192 oxygen atoms, one oxygen atom from a carboxylate group of **C7BPCA3**, two oxygen atoms from  
193 two sulfate anions and two water molecules in the coordination sphere of the uranium atom. The

194 O=U=O angle is found to be 178.0(3)°, while the U=O distance are 1.764(6) and 1.767(6) Å,  
 195 respectively. For the oxygen atoms in the equatorial plane, U-O bond lengths vary from 2.311(6) to  
 196 2.483(6) Å. The sulfate-bridged uranyl nodes are further connected by **C7BPCA3**, resulting in a  
 197 zigzag chain (Figure 3b). Different from **URCP1** and **URCP2**, both carboxylate groups at the  
 198 terminals of the pyridinium rings are monodentate. CB[6] hosts prefer to interact with the metal  
 199 nodes through O-H···O hydrogen bonds but not metal-ligand coordination (Figure 3c and S7b), with  
 200 a H···O length of 2.015 Å. Besides, the coordinated water molecules can form intra molecular O-  
 201 H···O bonds with the carboxylate oxygen atom, with the distances being 1.691 Å.  
 202

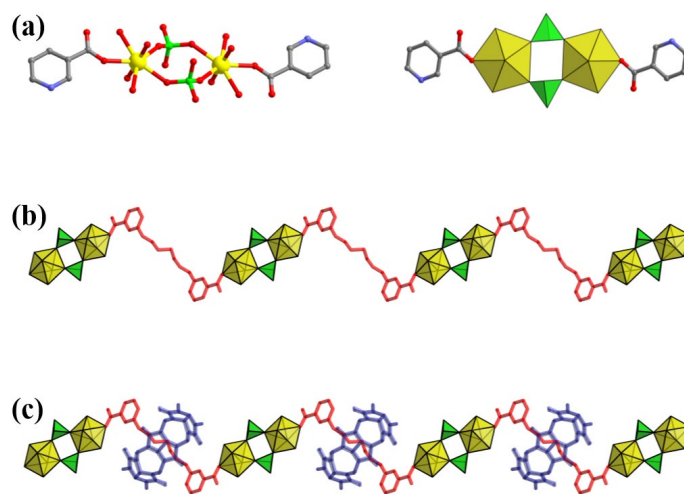

204  
 205 **Figure 3.** (a) Coordination environment for the dimeric uranyl centre in **URCP3**: the left is the one with the uranyl  
 206 centre is shown as stick-ball mode and the right is shown as polyhedron mode. (b) The 1D uranyl-directed chain  
 207 linked by **C7BPCA3** guests. (c) The CB[6] hosts hang on the alkyl chains of **C7BPCA3** guests.  
 208

209 **URCP4** crystallizes in the space group of  $P2_12_12_1$  and is a 1D chain-like polymers. Two types of  
 210 uranyl centres can be observed in this compound, one is a monomeric uranyl centre and the other is  
 211 a hydroxyl-bridged dimer, with all uranium atoms being 7-fold coordinated. For uranium atom in  
 212 the mononuclear node, there are two axial oxygen atoms, two oxygen atoms from two carboxylates  
 213 of **C7BPCA3** and three water molecules attending in the first coordination sphere (Figure 4a and  
 214 S8a). Multiple O-H···O hydrogen bonds can be found between the coordinated water molecules and  
 215 the host-guest complex (Figure S8b). The other uranyl centre in **URCP4** is dimeric and contains  
 216 two uranium atoms with the same coordination environment, which are bridged by two hydroxyl  
 217 anions (Figure 4b). For both uranium atoms, except the two axial oxygen atoms, one oxygen atom  
 218 from the carboxylate group of **C7BPCA3**, two oxygen atoms from a bidentate-coordinated sulfate

219 anion and two  $\mu_2$ -hydroxyl oxygen atoms are present in the equatorial plane. The U=O bond lengths  
 220 are in the range of 1.77(5) ~ 1.84(2) Å, with the O=U=O angle varying from 176.1(11)° to 178.7(9)°.  
 221 Meanwhile, the U-O distances in the equatorial planes of these three uranium atoms are in the range  
 222 of 2.32(2) ~ 2.52(2) Å. As Figure 4c shows, two **C7BPCA3** molecules bond to both terminals of  
 223 the sulfate-containing uranyl dimer through one end carboxylate groups, with the other ends further  
 224 coordinating with another mononuclear uranyl nodes. A 1D kinked chain has formed, which is *N*-  
 225 sharpened when viewed from the side. All the CB[6] hosts just hang on the alkyl chain like that  
 226 observed in **URCP1-URCP3**, without participating in the coordination with uranyl cations (Figure  
 227 4d).  
 228

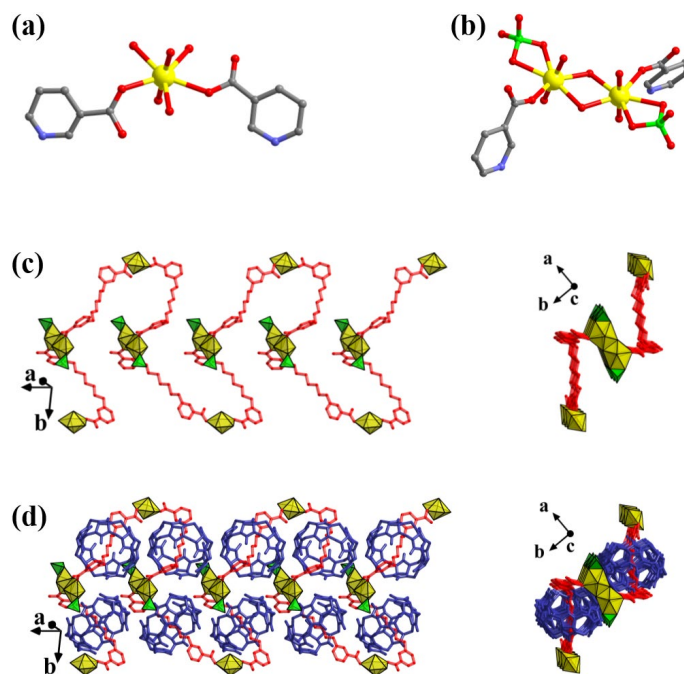

230  
 231 **Figure 4.** (a-b) Coordination environments for the two different uranyl centres in **URCP4**. (c) The 1D uranyl-  
 232 directed chain linked by **C7BPCA3** guests, with two types of uranyl centres acting as nodes. (c) The CB[6] hosts  
 233 hang on the alkyl chains of **C7BPCA3** guests.  
 234

235 **URCP5** is a 2D compound crystallizing in the space group of  $P2_1/c$ . The metal node is a trimer  
 236 containing three 7-fold coordinated uranyl cations and two sulfate anions (Figure 5a and S9). For  
 237 both U1 and U2, in addition to the two axial oxygen atoms, there are one oxygen atom from a  
 238 carboxylate group of **C7BPCA3**, two oxygen atoms from a sulfate anion and two  $\mu_2$ -hydroxyl  
 239 oxygen atoms in the coordination sphere. For U3, there are two axial oxygen atoms, two oxygen  
 240 atoms from two carboxylate groups of **C7BPCA3**, one oxygen atom from a sulfate anion, one

241 oxygen atom from a carbonyl group of CB[6] and a water molecule coordinating in the equatorial  
 242 plane. The U=O bond lengths for all uranium atoms in the trimeric centre vary from 1.738(5) to  
 243 1.777(5) Å, with the O=U=O angle being in range of 176.7(2)° ~ 179.1(3)°. The U-O bond lengths  
 244 in the equatorial planes of these three uranium atoms span from 2.257(6) to 2.530(5) Å. Specifically,  
 245 CB[6] has also appeared in the coordination sphere of the uranyl centre (Figure 5b), which is quite  
 246 similar to our previous work involving host-guest synergetic coordination of cucurbituril-based  
 247 ligand in uranyl coordination polyrotaxane<sup>31</sup>. It seems that the uranyl dimers are first connected by  
 248 the **C7BPCA3** molecules to form zigzag chains, with two sulfate anions located at the terminals of  
 249 the uranyl nodes. Then, another array of pseudorotaxane ligands with a different orientation link  
 250 different 1D chains one by one through a third monomeric uranyl anchored to the terminal sulfate  
 251 ion, forming a special 2D network (Figure 5c and S10). Macrocyclic CB[6] hosts in **URCP5** present  
 252 two types of behaviors. CB[6] host related to the zigzag chains just hang on the chain like beads  
 253 (the blue ones shown in Figure 5d), while those in pseudorotaxane linkers for connecting 1D chains  
 254 have coordinated to the uranyl cations together with the string **C7BPCA3** via a host-guest synergetic  
 255 coordination mode (the pink ones shown in Figure 5d).

256

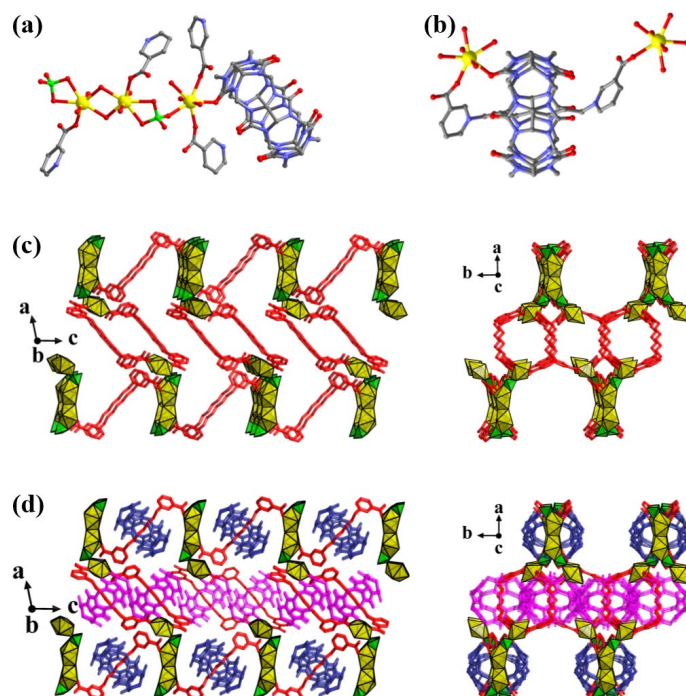

258 **Figure 5.** (a-b) Coordination environments for the two different uranyl centres in **URCP5**. (c) The 2D network linked  
 259 by **C7BPCA3** guests, with two types of uranyl centres acting as nodes. (c) Two types of CB[6] observed in **URCP5**:  
 260 the blue ones are those hanging on the skeleton without participating in the coordination with uranyl, and the pink  
 261 are those synergistically coordinated with the uranyl centre together with **C7BPCA3** molecules.

262

263 **Different Coordination Behaviors of C7BPCA3@CB[6] in Uranyl Coordination**  
 264 **Polyrotaxanes.** Actually, cucurbit[*n*]uril and their derivatives (CB[*n*], *n* = 5, 6, 7 and 8) have been  
 265 demonstrated to be versatile struts, either as guest-free macrocyclic ligand or corresponding  
 266 pseudorotaxanes, to build metal-organic coordination frameworks<sup>36-38</sup>. The most obvious difference  
 267 between the pure macrocyclic molecule and related supramolecular ligand is the coordination model.  
 268 As for uranyl coordination complexes, when CB[*n*] molecules were used as organic linkers, they  
 269 can mainly coordinate with metal cations through the portal carbonyl groups which have good  
 270 affinity towards metal cations (Figure 6a)<sup>39</sup>. However, when CB[*n*] macrocycles were pre-  
 271 assembled with string guests to give pseudorotaxane ligand, they prefer to be inert in the  
 272 coordination with metal cations. As a result, only the guest molecules with functional ends  
 273 (carboxylate groups) located at para or meta positions tend to bind with the uranyl center, either in  
 274 monodentate- or bidentate-mode, while the macrocyclic hosts generally hang on the skeleton like  
 275 beads (Figure 6b)<sup>28-30</sup>. Besides, if the end groups of the guests were cut off, uranyl might undergo  
 276 no coordination with both component of the pseudorotaxane precursor, but only formed ionic  
 277 cocrystal compound through the weak interaction such as hydrogen bonds between the  
 278 pseudorotaxanes and metal center (Figure 6c)<sup>21</sup>.

279

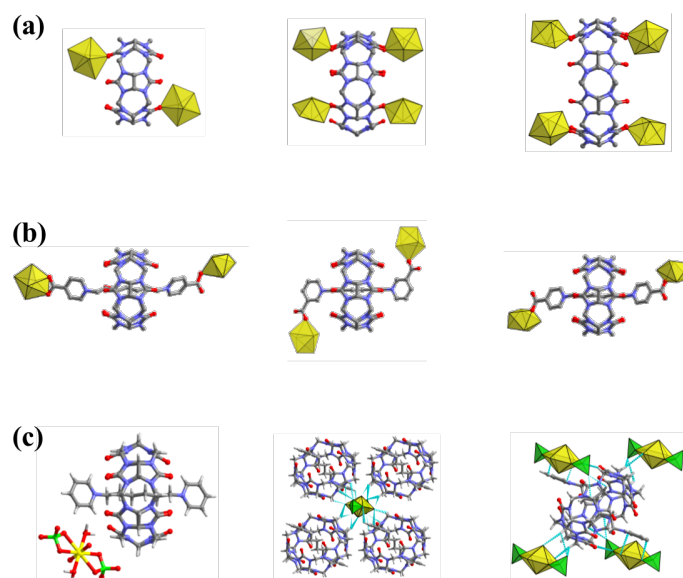

281 **Figure 6.** (a) Uranyl coordination compounds formed based on CB[6] (left), CB[7] (middle), and CB[8] (right)<sup>39</sup>.  
 282 (b) General coordination mode of CB[6]-based pseudorotaxane in uranyl coordination polymers<sup>28-30</sup>. (c) Ionic  
 283 cocrystal compound given by uranyl and CB[6]-pseudorotaxane without end functional group<sup>21</sup>.

284

285 To achieve the simultaneous or synergetic metal-organic coordination of both components in

286 CB[*n*]-based pseudorotaxane ligand, we proposed to employ weakly-bonded host-guest complexes  
 287 as organic linkers or introduce proximity effect into the well-defined pseudorotaxane ligand in  
 288 previous work<sup>28-31</sup>. In the present work, we combined these two strategies into one precursor, *i.e.*,  
 289 moving the functional groups of the guest molecule in a weakly-bonded ligand from the *para*- to  
 290 *meta*-position. Due to the weak binding between the host and guest components, **C7BPCA3@CB[6]**  
 291 motifs have shown different molecular conformations in **URCP1-URCP5**. As shown in shown in  
 292 Figure 7, the configuration changes of the pseudorotaxane ligand can be well illustrated by variety  
 293 of the distances between the two nitrogen cations of the pyridinium rings (*d*) and the angles between  
 294 the CB[6] portal and the pyridinium ring ( $\varphi$ ).

295

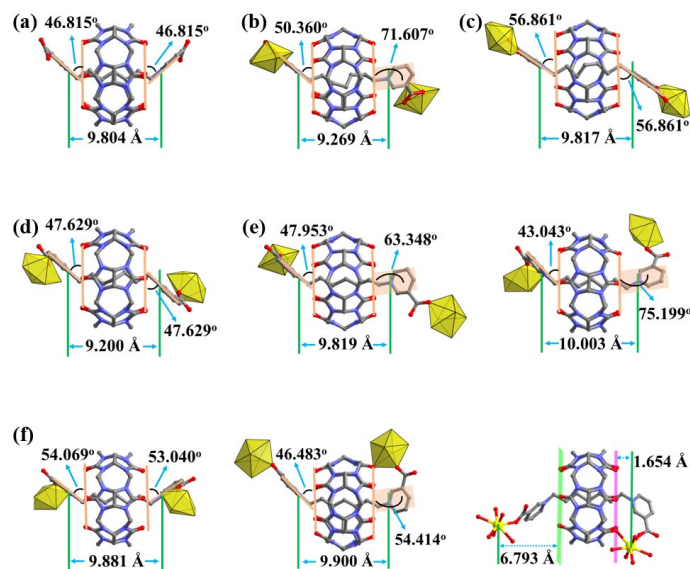

297

298 **Figure 7.** The values of *d* and  $\varphi$  in (a) metal-free **C7BPCA3@CB[6]** precursor, (b) **URCP1**, (c) **URCP2**, (d) **URCP3**,  
 299 (e) **URCP4** and (f) **URCP5**.

300

301 Due to the rich molecular configuration of **C7BPCA3@CB[6]**, three different coordination  
 302 modes of the pseudorotaxane ligand can be found in the obtained URCPs (Figure 8a). Mode 1 is the  
 303 most common and can be observed from **URCP1** to **URCP5** (Figure S11a). In this situation, only  
 304 the dicarboxylate guest coordinates with the uranyl centre but the CB[6] host just hangs on the alkyl  
 305 chain like a bead. Since the pseudorotaxane linker has kept the molecular configuration of the  
 306 pseudorotaxane precursor, the whole building unit is still in *trans*-mode. In term of the connecting  
 307 pattern, mode 2 is similar to mode 1 and can be observed in **URCP4** and **URCP5** (Figure S11b).  
 308 However, the building unit adopts a *cis*-mode conformation. It's not hard to imagine that

309 **C7BPCA3@CB[6]** tends to undergo a conformational flip and then coordinates with the uranyl  
 310 centre (Figure 8b). Actually, such a conformational flip of the pseudorotaxane ligand is very rare in  
 311 previously-reported uranyl coordination polyrotaxanes. In this case, it can be attributed to the weak  
 312 binding between the host and guest components, which can endow the whole molecule much more  
 313 flexibility. Mode 3 can only be observed in **URCP5** (Figure S11c), in which both the host and guest  
 314 components of one pseudorotaxane ligand have synergistically coordinated with the same uranyl  
 315 centre. As shown in Figure 8c, it seems that the **C7BPCA3@CB[6]** prefers to take a conformational  
 316 flip like the supramolecular ligand in mode 2, following by coordinating with the uranyl centres  
 317 through the carboxylate groups of **C7BPCA3**. Additionally, the special molecular conformation can  
 318 provide the possibility for the CB[6] macrocycle surround **C7BPCA3** to chelate with the metal  
 319 cation. This kind of synergetic coordination behavior of pseudorotaxane ligand can be attributed to  
 320 the proximity effect existing between the carboxylate groups of **C7BPCA3** guest and the portal  
 321 carbonyl groups of CB[6] host (Figure S12a). Relatively, for **C7BPCA4@CB[6]** with the functional  
 322 carboxylate groups located at the *para*-positions<sup>28</sup>, although the weakly binding could offer CB[6]  
 323 the ability to coordinate with uranyl cations, the host and guest components tended to bond with  
 324 different uranyl centre as no proximity effective could be observed (Figure S12b).

325

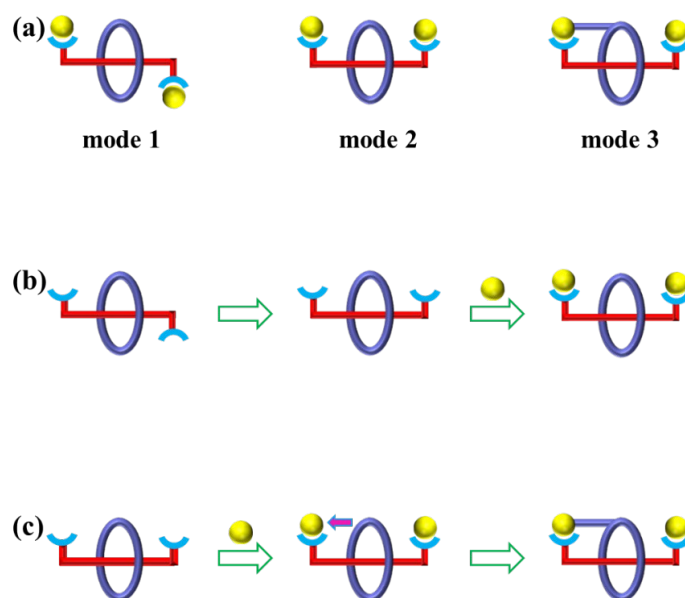

327

328 **Figure 8.** (a) Three coordination modes observed in **URCP1-URCP5**. (b) Diagram of mode 2 in **URCP4** and  
 329 **URCP5**. (c) Diagram of mode 3 in **URCP5**.

330

331 This kind of proximity effects were also observed in our previous work involving a well-  
332 bonded pseudorotaxane ligand **C6BPCA3@CB[6]**<sup>31</sup>, in which the guest was hexyl-bridged. In that  
333 case, the proximity effect produced by the special molecular conformation of the supramolecular  
334 ligand, *i.e.*, *meta*-substituted carboxylate groups can effectively shorten the distance between the  
335 uranyl centers and the CB[6] host, giving the carbonyl groups on both portals the chance to chelate  
336 with the metal cations together with adjacent carboxylate groups of the **C6BPCA3** guest (Figure  
337 S12c). However, the guest length ( $d = 9.804 \text{ \AA}$ ) of **C7BPCA3@CB[6]** is obviously longer than that  
338 of the **C6BPCA3@CB[6]** ( $d = 8.794 \text{ \AA}$ ). This means that prolonging of the guest length may  
339 partially diminish the proximity effect given by the *meta*-substituted functional groups. As a  
340 consequence, CB[6] can only unilaterally coordinate with the uranyl center through portal carbonyl  
341 groups at one end but not both (Figure S12c).

342

343 **FTIR, PXRD, TGA, and PL Analyses.** A sufficient amount of crystal samples of **URCP1–URCP5**  
344 were collected and dried at 80 °C overnight, which were carried out for FTIR analyses. As shown  
345 in Figure S13, the wide band around 3500 cm<sup>-1</sup> should be attributed to the water molecules  
346 coordinated with the uranyl centres or those located in the crystal lattices. The pyridinium ring of  
347 **C7BPCA3@CB[6]** have shown their characteristic peaks at ~3080 cm<sup>-1</sup>. The peaks in the range of  
348 2900 ~ 3000 cm<sup>-1</sup> should be assigned to the methylene and methine groups of **C7BPCA3** and CB[6].  
349 The vibrations of the carboxylate groups of **C7BPCA3** and the carbonyl groups of CB[6] are  
350 observed in the range of 1570 ~ 1720 cm<sup>-1</sup>. The existence of uranyl cation has been proven by the  
351 U=O stretching vibrations appearing in the region of 960 ~ 970 cm<sup>-1</sup>. The peak at ~1470 belonging  
352 to C-N bond can also prove the existence of pyridinium, while those around 1370, 1320, 1270 and  
353 1230 cm<sup>-1</sup> come from the vibration of N-CO-N groups in CB[6]. The existence of uranyl cation for  
354 all coordination polymers has been proven by the U=O stretching vibrations appearing in the region  
355 of 960 ~ 970 cm<sup>-1</sup>. Other peaks in fingerprint region have also indicated the existence of pyridinium  
356 ring of the pseudorotaxane ligand.

357 For PXRD, only **URCP1**, **URCP4** and **URCP5** show high phase purity, which is demonstrated  
358 by the good match between the experimental and simulated patterns of these compounds (Figure  
359 S14). For **URCP1**, all peaks in the experimental pattern are sharper than that in the simulated pattern,  
360 which might be caused by the loss of crystal water molecules during the drying process. For **URCP4**



361 and **URCP5**, the experimental patterns present some broadenings when compared with the  
362 simulated ones, especially those at higher  $2\theta$ . This may be caused by the size effect, as the grinding  
363 before carrying out PXRD may give much smaller crystals, although they might be obtained in  
364 micrometer-scale. The TGA results suggest that these three compounds have good thermal stability,  
365 and no obvious weight loss occurs below 350 °C (Figure S15), except those of the crystal water  
366 molecules. When the temperature further increases, all compounds began to decompose, which  
367 might be due to the destruction of the pseudorotaxane linker and the breaking of the coordination  
368 bonds between the uranyl centers and supramolecular ligands.

369 Shown in Figure 9 are the PL spectra of **URCP1**, **URCP4** and **URCP5** with  $\text{UO}_2(\text{NO}_3)_2 \cdot 6\text{H}_2\text{O}$   
370 acting as control. The difference of the luminescent features among these compounds are caused by  
371 their various coordination modes between the uranyl centers and the pseudorotaxane ligands.<sup>40-41</sup>  
372 The fluorescent peaks of **URCP1** are obviously broadened when compared with that of uranyl  
373 nitrate. This is due to that **URCP1** contains a dimeric uranyl centre, and the two crystallographically  
374 non-equivalent uranium atoms will interplay with each other in the luminescent emission. For  
375 **URCP4** and **URCP5**, the broadening of the PL spectra appears to be more obvious, which should  
376 also be explained by the overlap among different uranyl cations in multimeric centers. Red shifts  
377 can be observed for all the three compounds, which may be caused by the coordination of uranyl  
378 with the organic linker.

379

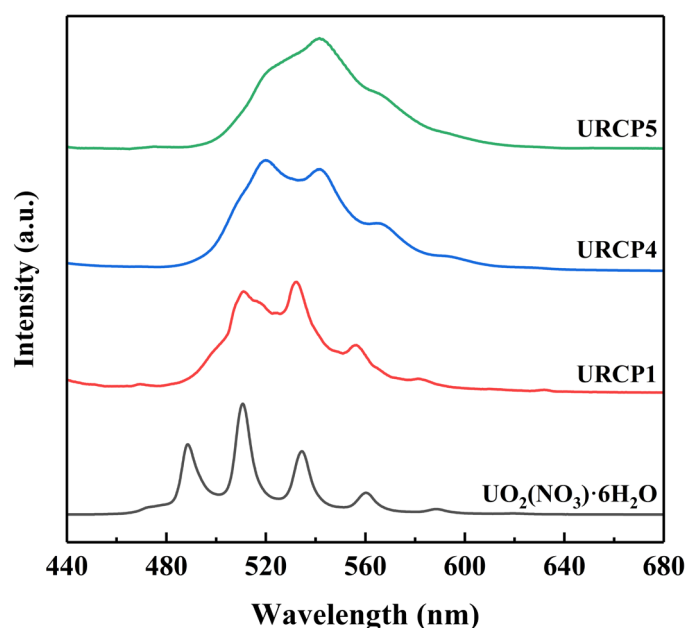

381 **Figure 9.** PL spectra of **URCP1**, **URCP4** and **URCP5** with uranyl nitrate as a comparison.

382

### 383 **Conclusion**

384 In this work, we proposed to introduce *meta*-substituted functional groups into weakly-bonded  
385 pseudorotaxane ligand, with an attempt to explore the proximity effect on uranyl coordination of  
386 weak-bonded CB[6]-bipyridinium pseudorotaxane ligands and achieve structure regulation of  
387 uranyl coordination polyrotaxanes. The strategy has been demonstrated to be effective, and five  
388 different URCPs varying from 1D to 2D have been obtained. Single crystal structure analyses show  
389 that the designed pseudorotaxane can exhibit rich conformational variety, and result in three metal  
390 coordination modes in the prepared URCPs. More interestingly, synergetic host-guest coordination  
391 is also observed in these uranyl coordination polyrotaxanes, which is totally different from the mode  
392 of its *para*-substituted pseudorotaxane analogue. It indicates that the impact of proximity effect on  
393 uranyl coordination can also be achieved in weak-bonded CB[6]-bipyridinium pseudorotaxane  
394 linkers. The outcome of this work can not only enrich the library of actinide-rotaxane coordination  
395 polymers, but can also provide some important hints for the design and synthesis of other metal-  
396 organic frameworks.

397

### 398 **Conflicts of interest**

399 The authors declare no competing financial interest.

### 400 **Acknowledgment**

401 This work is financially supported by the National Natural Science Foundation of China (21876122,  
402 22076186, and 22076187). The National Science Fund for Distinguished Young Scholars  
403 (21925603) is also acknowledged. The authors also would like to thank Dr Meng Yang in College  
404 of Chemistry, Sichuan University, for his helpful assistance with X-ray single crystal measurements,  
405 solutions and refinements.

### 406 **References**

407

- 408 1. Dolgoplova, E. A.; Rice, A. M.; Shustova, N. B., Actinide-based MOFs: a middle ground in solution and solid-  
409 state structural motifs. *Chem Commun* **2018**, *54*, 6472-6483.
- 410 2. Martin, C. R.; Leith, G. A.; Shustova, N. B., Beyond structural motifs: the frontier of actinide-containing metal-  
411 organic frameworks. *Chem Sci* **2021**, *12*, 7214-7230.

- 412 3. Andrews, M. B.; Cahill, C. L., Uranyl bearing hybrid materials: synthesis, speciation, and solid-state structures.  
413 *Chem Rev* **2013**, *113*, 1121-1136.
- 414 4. Loiseau, T.; Mihalcea, I.; Henry, N.; Volkringer, C., The crystal chemistry of uranium carboxylates. *Coordination Chem*  
415 *Rev* **2014**, *266*, 69-109.
- 416 5. Wang, Y.; Liu, Z.; Li, Y.; Bai, Z.; Liu, W.; Wang, Y.; Xu, X.; Xiao, C.; Sheng, D.; Diwu, J.; Su, J.; Chai, Z.;  
417 Albrecht-Schmitt, T. E.; Wang, S., Umbellate distortions of the uranyl coordination environment result in a stable  
418 and porous polycatenated framework that can effectively remove cesium from aqueous solutions. *J Am Chem Soc*  
419 **2015**, *137*, 6144-7.
- 420 6. Hu, F. L.; Di, Z. Y.; Lin, P.; Huang, P.; Wu, M. Y.; Jiang, F. L.; Hong, M. C., An anionic uranium-based metal-  
421 organic framework with ultralarge nanocages for selective dye adsorption. *Cryst. Growth Des.* **2018**, *18*, 576-580.
- 422 7. Wang, Y.; Li, Y.; Bai, Z.; Xiao, C.; Liu, Z.; Liu, W.; Chen, L.; He, W.; Diwu, J.; Chai, Z.; Albrecht-Schmitt, T. E.;  
423 Wang, S., Design and synthesis of a chiral uranium-based microporous metal organic framework with high SHG  
424 efficiency and sequestration potential for low-valent actinides. *Dalton Trans* **2015**, *44*, 18810-18814.
- 425 8. Liu, C.; Wang, C.; Sun, Z. M., Conformational 2-fold interpenetrated uranyl supramolecular isomers based on  
426 (6,3) sheet topology: structure, luminescence, and ion exchange. *Inorg Chem* **2018**, *57*, 15370-15378.
- 427 9. Ai, J.; Chen, F. Y.; Gao, C. Y.; Tian, H. R.; Pan, Q. J.; Sun, Z. M., Porous anionic uranyl-organic networks for  
428 highly efficient Cs<sup>+</sup> adsorption and investigation of the mechanism. *Inorg Chem* **2018**, *57*, 4419-4426.
- 429 10. Xie, J.; Wang, Y.; Liu, W.; Yin, X.; Chen, L.; Zou, Y.; Diwu, J.; Chai, Z.; Albrecht-Schmitt, T. E.; Liu, G.; Wang,  
430 S., Highly sensitive detection of ionizing radiations by a photoluminescent uranyl organic framework. *Angew Chem,*  
431 *Int Ed* **2017**, *56*, 7500-7504.
- 432 11. Wang, Y.; Yin, X.; Liu, W.; Xie, J.; Chen, J.; Silver, M. A.; Sheng, D.; Chen, L.; Diwu, J.; Liu, N.; Chai, Z.;  
433 Albrecht-Schmitt, T. E.; Wang, S., Emergence of uranium as a distinct metal center for building intrinsic X-ray  
434 scintillators. *Angew Chem, Int Ed* **2018**, *57*, 7883-7887.
- 435 12. Liu, W.; Xie, J.; Zhang, L.; Silver, M. A.; Wang, S., A hydrolytically stable uranyl organic framework for highly  
436 sensitive and selective detection of Fe<sup>3+</sup> in aqueous media. *Dalton Trans* **2018**, *47*, 649-653.
- 437 13. Hu, K. Q.; Wu, Q. Y.; Mei, L.; Zhang, X. L.; Ma, L.; Song, G.; Chen, D. Y.; Wang, Y. T.; Chai, Z. F.; Shi, W. Q.,  
438 Novel viologen derivative based uranyl coordination polymers featuring photochromic behaviors. *Chem -Eur J* **2017**,  
439 *23*, 18074-18083.
- 440 14. Kong, X. H.; Hu, K. Q.; Mei, L.; Li, A.; Liu, K.; Zeng, L. W.; Wu, Q. Y.; Chai, Z. F.; Nie, C. M.; Shi, W. Q.,  
441 Double-layer nitrogen-rich two-dimensional anionic uranyl-organic framework for cation dye capture and catalytic  
442 fixation of carbon dioxide. *Inorg Chem* **2021**, *60*, 11485-11495.
- 443 15. Andrew T. Kerr; Sayon A. Kumalah; K. T. Holman; Butcher, R. J.; Cahill, C. L., Uranyl coordination polymers  
444 incorporating  $\eta^5$ -cyclopentadienyliron-functionalized  $\eta^6$ -phthalate metalloligands: syntheses, structures and  
445 photophysical properties. *J Inorg Organomet Polym Mater* **2014**, *24*, 128-136.
- 446 16. Si, Z. X.; Xu, W.; Zheng, Y. Q., Synthesis, structure, luminescence and photocatalytic properties of an uranyl-  
447 2,5-pyridinedicarboxylate coordination polymer. *J Solid State Chem* **2016**, *239*, 139-144.
- 448 17. Vukotic, V. N.; Loeb, S. J., Coordination polymers containing rotaxane linkers. *Chem Soc Rev* **2012**, *41*, 5896-  
449 906.
- 450 18. Yang, X.; Giorgi, M.; Karoui, H.; Gimes, D.; Hornebecq, V.; Ouari, O.; Kermagoret, A.; Bardelang, D., A single-  
451 crystal-to-single-crystal transformation affording photochromic 3D MORF crystals. *Chem Commun* **2019**, *55*,  
452 13824-13827.
- 453 19. Wilson, B. H.; Abdulla, L. M.; Schurko, R. W.; Loeb, S. J., Translational dynamics of a non-degenerate molecular  
454 shuttle imbedded in a zirconium metal-organic framework. *Chem Sci* **2021**, *12*, 3944-3951.
- 455 20. Gholami, G.; Wilson, B. H.; Zhu, K.; O'Keefe, C. A.; Schurko, R. W.; Loeb, S. J., Exploring the dynamics of Zr-

456 based metal-organic frameworks containing mechanically interlocked molecular shuttles. *Faraday Discuss* **2021**,  
457 225, 358-370.

458 21. Li, F. Z.; Geng, J. S.; Hu, K. Q.; Zeng, L. W.; Wang, J. Y.; Kong, X. H.; Liu, N.; Chai, Z. F.; Mei, L.; Shi, W. Q.,  
459 Temperature-triggered structural dynamics of non-coordinating guest moieties in a fluorescent actinide polyrotaxane  
460 framework. *Chem-Eur J* **2021**, *27*, 8730-8736.

461 22. Mei, L.; Shi, W. Q.; Chai, Z. F., Ordered entanglement in actinide-organic coordination polymers. *B Chem Soc*  
462 *Jpn* **2018**, *91*, 554-562.

463 23. Mei, L.; Wu, Q. Y.; Liu, C. M.; Zhao, Y. L.; Chai, Z. F.; Shi, W. Q., The first case of an actinide polyrotaxane  
464 incorporating cucurbituril: a unique 'dragon-like' twist induced by a specific coordination pattern of uranium. *Chem*  
465 *Commun* **2014**, *50*, 3612-3615.

466 24. Mei, L.; Xie, Z. N.; Hu, K. Q.; Wang, L.; Yuan, L. Y.; Li, Z. J.; Chai, Z. F.; Shi, W. Q., First three-dimensional  
467 actinide polyrotaxane framework mediated by windmill-like six-connected oligomeric uranyl: dual roles of the  
468 pseudorotaxane precursor. *Dalton Trans* **2016**, *45*, 13304-13307.

469 25. Mei, L.; Xie, Z. N.; Hu, K. Q.; Yuan, L. Y.; Gao, Z. Q.; Chai, Z. F.; Shi, W. Q., Supramolecular host-guest  
470 inclusion for distinguishing cucurbit[7]uril-based pseudorotaxanes from small-molecule ligands in coordination  
471 assembly with a uranyl center. *Chem-Eur J* **2017**, *23*, 13995-14003.

472 26. Mei, L.; Wang, L.; Liu, C. M.; Zhao, Y. L.; Chai, Z. F.; Shi, W. Q., Tetranuclear uranyl polyrotaxanes: preferred  
473 selectivity toward uranyl tetramer for stabilizing a flexible polyrotaxane chain exhibiting weakened supramolecular  
474 inclusion. *Chem-Eur J* **2015**, *21*, 10226-10235.

475 27. Xie, Z. N.; Mei, L.; Hu, K. Q.; Xia, L. S.; Chai, Z. F.; Shi, W. Q., Mixed-ligand uranyl polyrotaxanes  
476 incorporating a sulfate/oxalate coligand: achieving structural diversity via pH-dependent competitive effect. *Inorg*  
477 *Chem* **2017**, *56*, 3227-3237.

478 28. Li, F. Z.; Mei, L.; Hu, K. Q.; Yu, J. P.; An, S. W.; Liu, K.; Chai, Z. F.; Liu, N.; Shi, W. Q., Releasing metal-  
479 coordination capacity of cucurbit[6]uril macrocycle in pseudorotaxane ligands for the construction of interwoven  
480 uranyl-rotaxane coordination polymers. *Inorg Chem* **2018**, *57*, 13513-13523.

481 29. Li, F. Z.; Mei, L.; Hu, K. Q.; An, S. W.; Wu, S.; Liu, N.; Chai, Z. F.; Shi, W. Q., Uranyl compounds involving a  
482 weakly bonded pseudorotaxane linker: combined effect of pH and competing ligands on uranyl coordination and  
483 speciation. *Inorg Chem* **2019**, *58*, 3271-3282.

484 30. Li, F. Z.; Mei, L.; An, S. W.; Hu, K. Q.; Chai, Z. F.; Liu, N.; Shi, W. Q., Kinked-helix actinide polyrotaxanes  
485 from weakly bound pseudorotaxane linkers with variable conformations. *Inorg Chem* **2020**, *59*, 4058-4067.

486 31. Li, F. Z.; Geng, J. S.; Hu, K. Q.; Yu, J. P.; Liu, N.; Chai, Z. F.; Mei, L.; Shi, W. Q., Proximity effect in uranyl  
487 coordination of the cucurbit[6]uril-bipyridinium pseudorotaxane ligand for promoting host-guest synergistic  
488 chelating. *Inorg Chem* **2021**, *60*, 10522-10534.

489 32. Sheldrick, G. M., A short history of SHELX. *Acta Crystallogr, Sect D: Struct Biol* **2008**, *64*, 112-122.

490 33. Usón, I.; Sheldrick, G. M., An introduction to experimental phasing of macromolecules illustrated by SHELX;  
491 new autotracing features. *Acta Crystallogr, Sect D: Struct Biol* **2018**, *74*, 106-116.

492 34. Dolomanov, O. V.; Bourhis, L. J.; Gildea, R. J.; Howard, J. A.; Puschmann, H., *OLEX2*: a complete structure  
493 solution, refinement and analysis program. *J Appl Crystallogr* **2009**, *42*, 339-341.

494 35. Spek, A. L., PLATON SQUEEZE: a tool for the calculation of the disordered solvent contribution to the  
495 calculated structure factors. *Acta Crystallogr, Sect C: Struct Chem* **2015**, *71*, 9-18.

496 36. Gao, R. H.; Huang, Y.; Chen, K.; Tao, Z., Cucurbit[n]uril/metal ion complex-based frameworks and their  
497 potential applications. *Coordin Chem Rev* **2021**, *437*, 213741.

498 37. Ni, X. L.; Xiao, X.; Cong H.; Liang L. L.; Cheng K.; Cheng X. J.; Ji N. N.; Zhu Q. J., Xue S. F. and Tao Z,  
499 Cucurbit[n]uril-based coordination chemistry\_ from simple coordination complexes to novel poly-dimensional

500 coordination polymers. *Chem Soc Rev* **2013**, *42*, 9480-9508.

501 38. Huang, Y.; Gao, R. H.; Liu, M.; Chen, L. X.; Ni, X. L.; Xiao, X.; Cong, H.; Zhu, Q. J.; Chen, K.; Tao, Z.,  
502 Cucurbit[n]uril-based supramolecular frameworks assembled through outer-surface interactions. *Angew Chem, Int*  
503 *Ed* **2021**, *60*, 15166-15191.

504 39. Thuery, P., Uranyl ion complexes with cucurbit[n]urils ( $n = 6, 7$ , and  $8$ ): A new family of uranyl-organic  
505 frameworks. *Cryst Growth & Des* **2008**, *8*, 4132-4143.

506 40. Thuéry, P.; Harrowfield, J., Structural variations in the uranyl/4,4'-biphenyldicarboxylate system. rare examples  
507 of 2D→3D polycatenated uranyl-organic networks. *Inorg Chem* **2015**, *54*, 8093-8102.

508 41. A.F. Leung; L. Hayashibara; Spadar, J., Fluorescence properties of uranyl nitrates. *J Phys Chem Solids* **1999**, *60*,  
509 299-304.

510

511

512 **Table of contents entry**

513

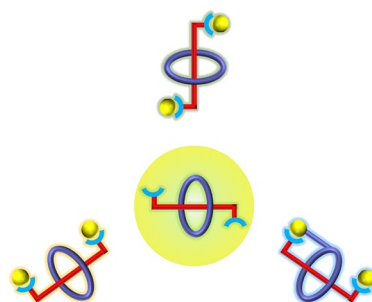

515

516 The proximity effect of weakly-bonded CB[6]-bipyridinium pseudorotaxane has great impact on  
517 the coordination mode of related uranyl polyrotaxane. Three different coordination modes have  
518 appeared, resulting in structure variety in the prepared uranyl compounds.
